# Supplementary material for: High-yield colloidal synthesis of monometallic Au nanorod–Au nanoparticle dimers and their application in SERS
Source: Royal Society of Chemistry journal article supplement (doi:10.1039/c7ra01039g), 2017-01-01
Supplement: c7ra01039g1.pdf [file c7ra01039g1.pdf]

Electronic Supplementary Information for

## High-Yield Colloidal Synthesis of Monometallic Au Nanorod-Au Nanoparticle Dimers and Their Application in SERS

Suli Chen,<sup>a</sup> Lei Chen,<sup>a</sup> Huicheng Hu,<sup>a</sup> Qipeng Liu,<sup>a</sup> Yong Xu,<sup>a</sup> Fei Ji,<sup>a</sup> Feng Bao,<sup>a</sup> Jian Fan,<sup>a,\*</sup> and Qiao

Zhang<sup>a,\*</sup>

*Institute of Functional Nano and Soft Materials (FUNSOM), Jiangsu Key Laboratory for Carbon-Based Functional Materials & Devices, Collaborative Innovation Center of Suzhou Nano Science and Technology, SWC for Synchrotron Radiation Research, Soochow University, Suzhou 215123, PR China*

Emails: [jianfan@suda.edu.cn](mailto:jianfan@suda.edu.cn) (J. Fan); [qiaozhang@suda.edu.cn](mailto:qiaozhang@suda.edu.cn) (Q. Zhang)

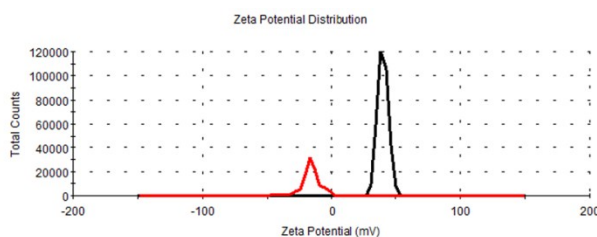

**Figure S1.** Zeta potential of CTAB-capped AuNRs (black line) and after treated with PSS (red line).

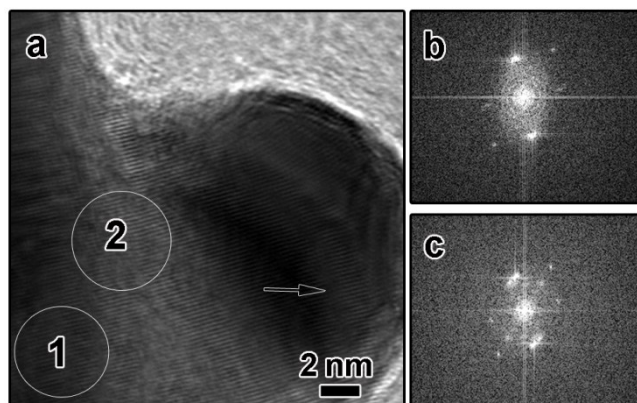

**Figure S2.** (a) HR-TEM image of the intermediate obtained after reacted for 15 min. The black arrow showing the stacking faults. (b) and (c) are FFT diffractions corresponding to the area marked as 1 and 2, respectively, in (a).

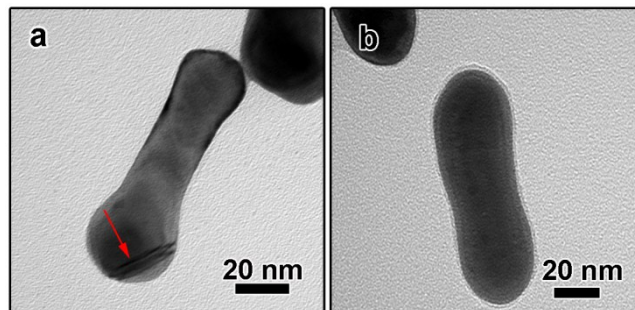

**Figure S3.** TEM image of Au nanostructures after seeded growth treated with different concentration of PSS: (a) 0 mg/mL “dog-bone” shape, (b) 3 mg/mL, peanut-like shape. The red arrow in (a) showing the presence of stacking faults at the newly grown layer.
